# Supplementary material for: Highly enhanced photocatalytic hydrogen evolution activity by modifying the surface of TiO2 nanoparticles with a high proportion of single Cu atoms
Source: Royal Society of Chemistry journal article supplement (doi:10.1039/d2cy00534d), 2022-01-01
Supplement: d2cy00534d1.pdf [file d2cy00534d1.pdf]

# **Highly enhanced photocatalytic hydrogen activity by constructing large portion of Cu single atoms on the surface of TiO<sub>2</sub>**

*Yiwen Ma, Yuxiang Ma, Tianping Lv, Xiyu Deng, Xinya Kuang, Jin Zhang, Qingju Liu\*, Yumin Zhang\**

Yunnan Key Laboratory for Micro/Nano Materials & Technology, National Center for International Research on Photoelectric and Energy Materials, School of Materials and Energy, Yunnan University, Kunming 650091, P. R. China.

\*Corresponding author: Yumin Zhang, E-mail: zhangyumin@ynu.edu.cn, Tel: +138 08725319;

Qingju Liu, E-mail: qjliu@ynu.edu.cn. Tel: +86 0871 65032713.

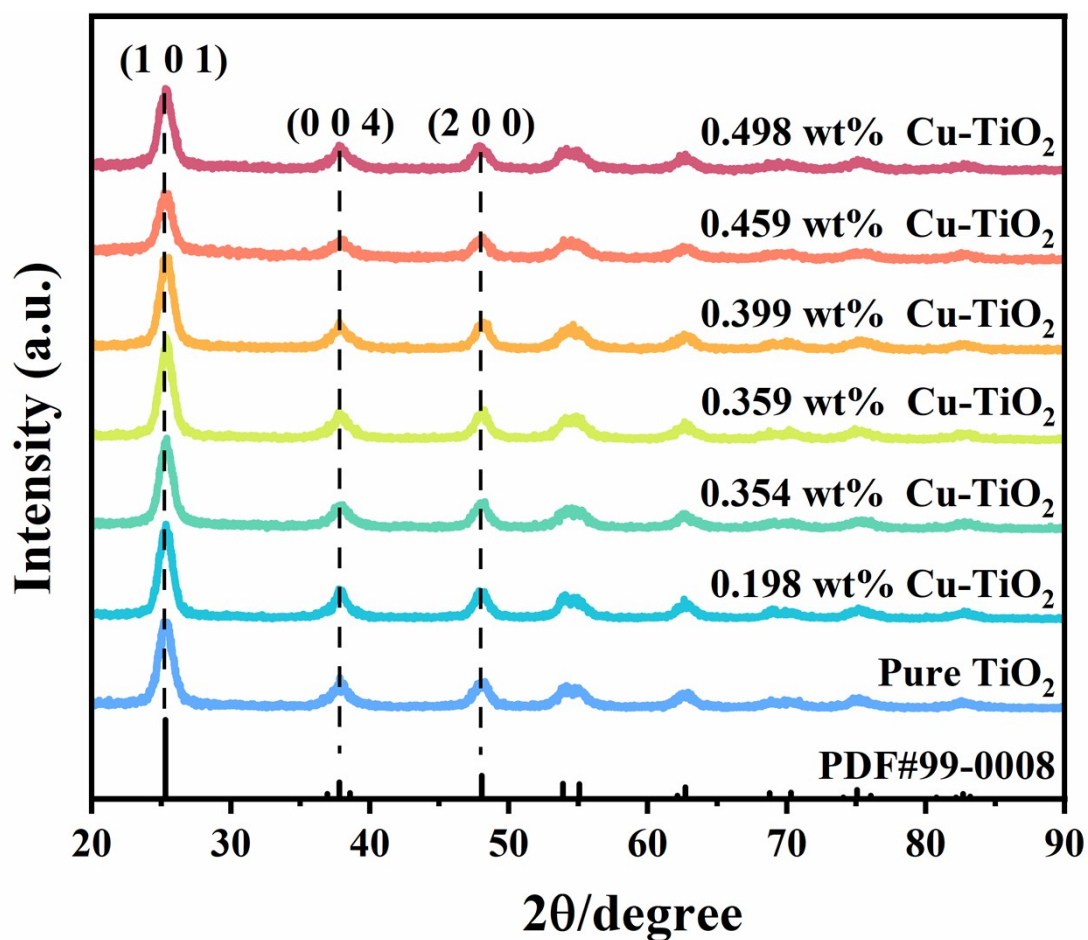

**Fig. S1** XRD patterns of TiO<sub>2</sub> samples with different Cu loading.

The crystal structures of Cu-TiO<sub>2</sub> samples and pure TiO<sub>2</sub> were investigated by XRD. As shown in Fig. S1, all TiO<sub>2</sub>-based samples are mainly composed of rutile-phase TiO<sub>2</sub> (PDF#99-0008). Well-defined diffraction angles (2θ) at 25.303, 37.792, 48.035° can be indexed as the (1 0 1), (0 0 4), (2 0 0) planes of anatase phase TiO<sub>2</sub>.<sup>[1]</sup>

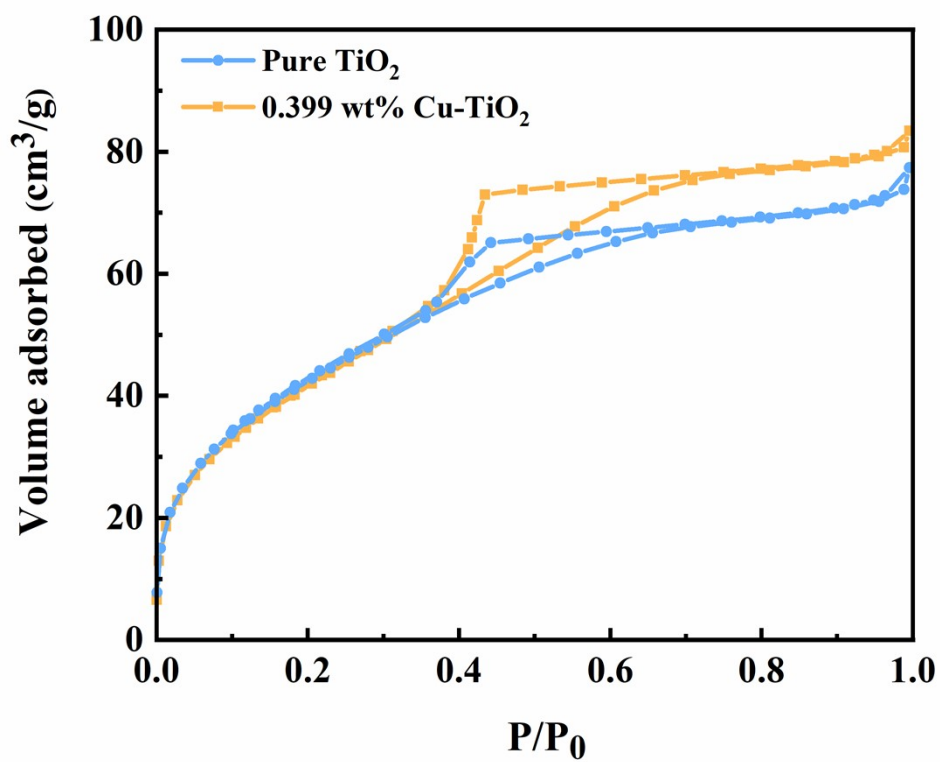

**Fig. S2** N<sub>2</sub> sorption isotherms of 0.399 wt% Cu-TiO<sub>2</sub> and pure TiO<sub>2</sub>, measured at 77 K.

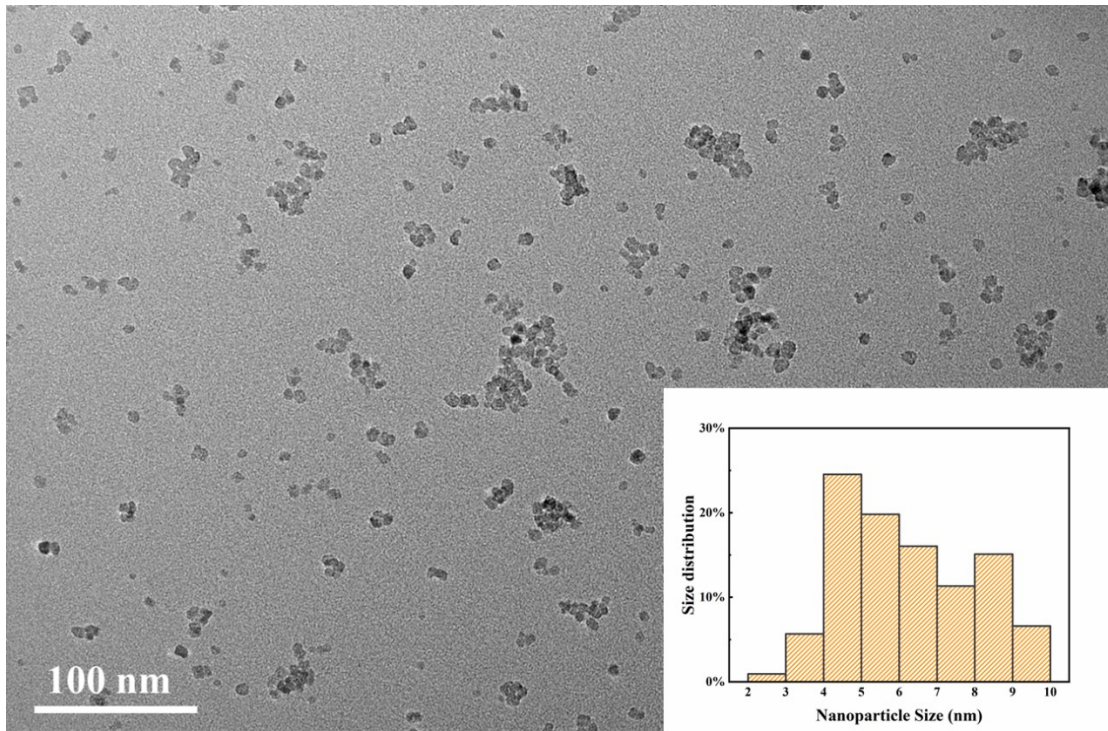

**Fig. S3** TEM image of 0.399 wt% Cu-TiO<sub>2</sub>.

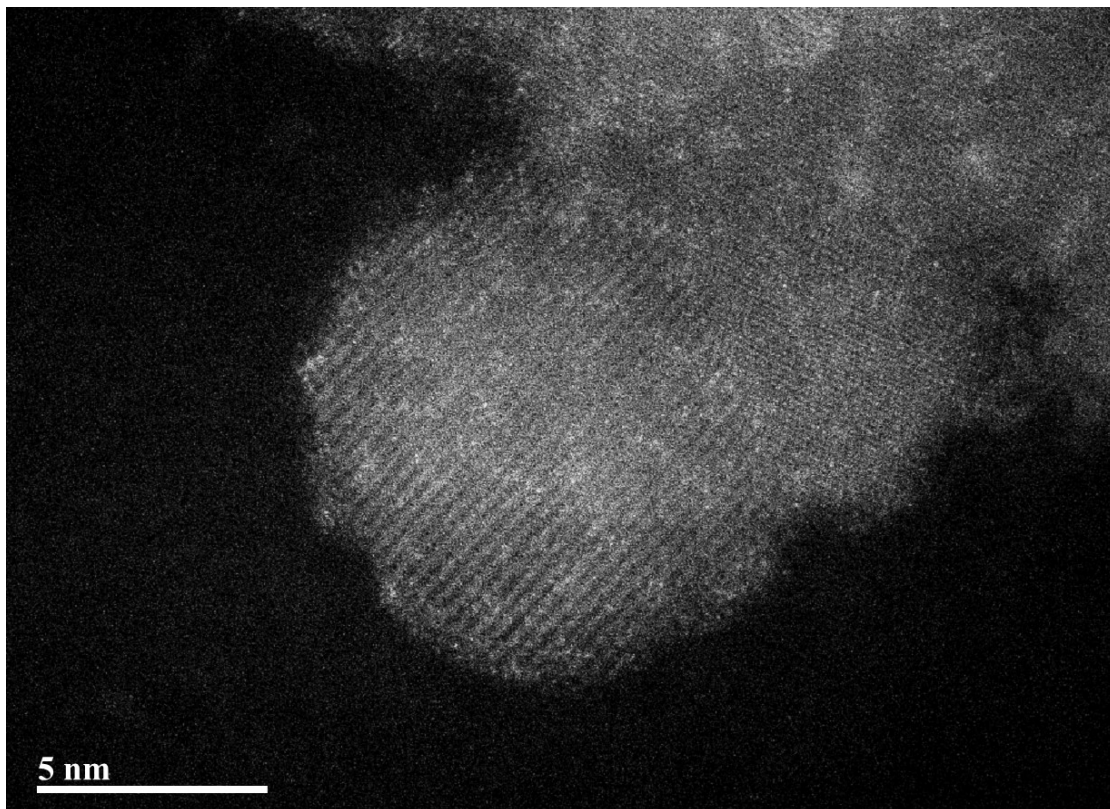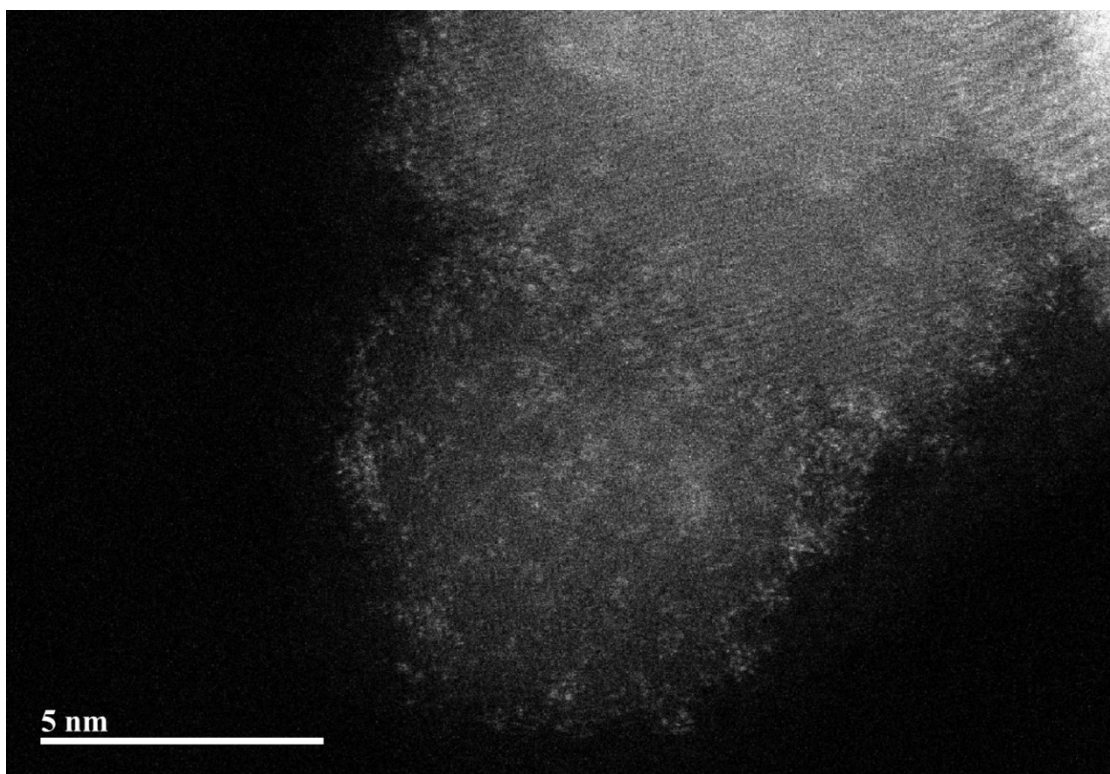

**Fig. S4** HAADF-STEM image of Cu-TiO<sub>2</sub>

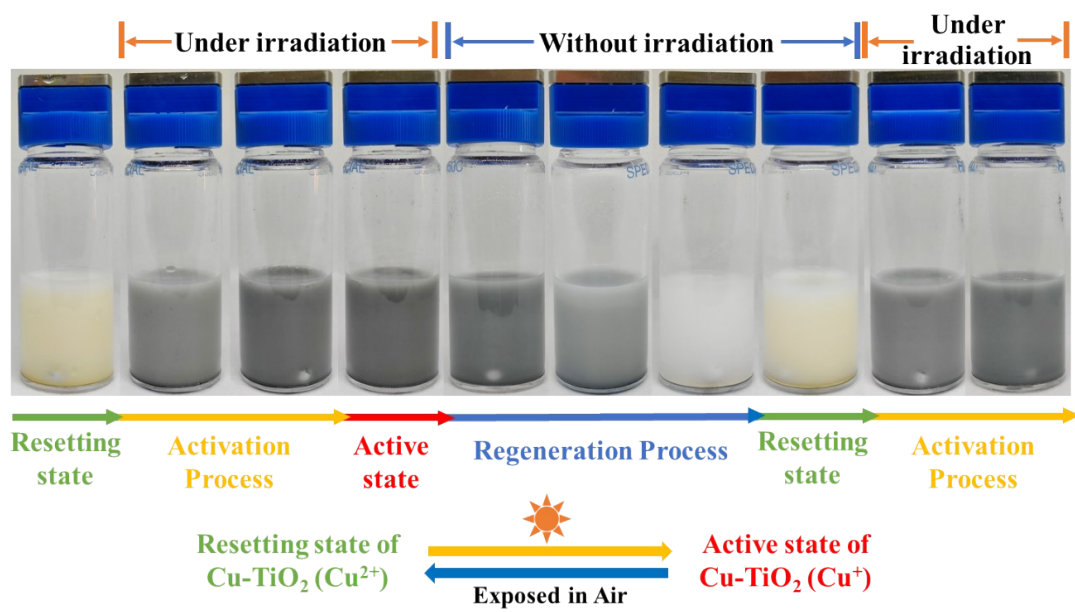

**Fig. S5** Cooperative photoactivation process and regeneration process of  $\text{Cu-TiO}_2$

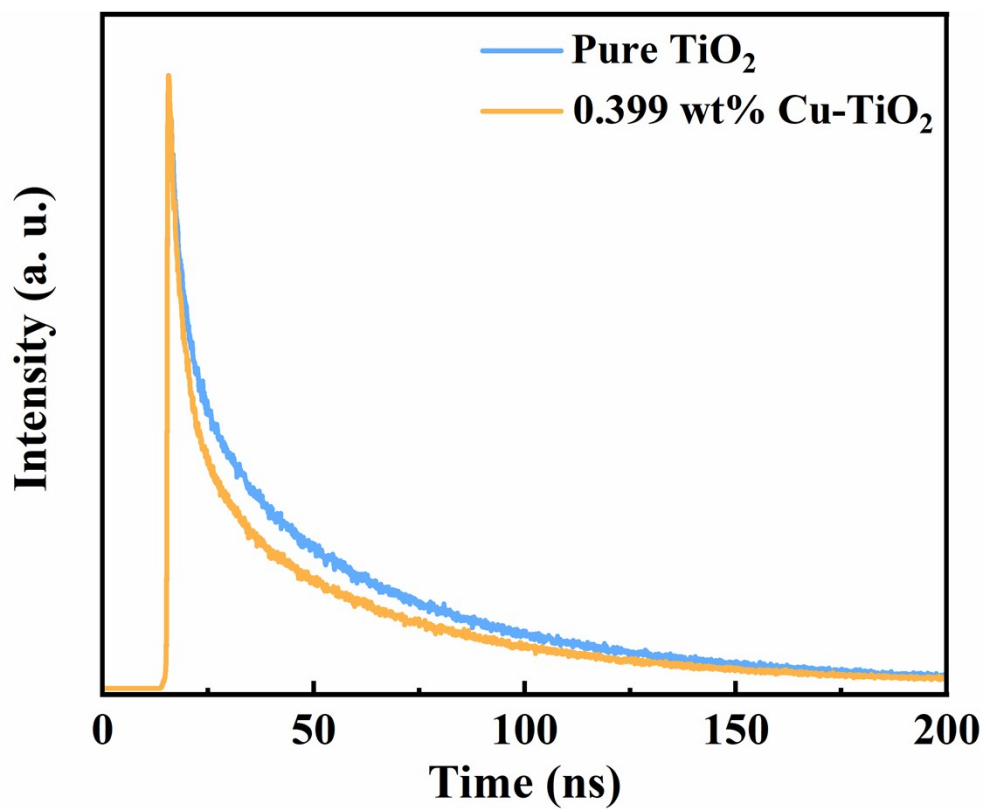

**Fig. S6** Fluorescence decay curves of pure TiO<sub>2</sub> and 0.399 wt% Cu-TiO<sub>2</sub>.

**Table S1.** Parameters from inductively couple plasma spectroscopy of Cu-TiO<sub>2</sub>

| <b>Sample</b>               | <b>Theoretical Cu ratio<br/>(wt.%)</b> | <b>ICP tested Cu<br/>ratio<br/>(wt.%)</b> |
|-----------------------------|----------------------------------------|-------------------------------------------|
| <b>pure TiO<sub>2</sub></b> | 0.000%                                 | 0.000%                                    |
| <b>Cu-TiO<sub>2</sub>-1</b> | 0.242%                                 | 0.198%                                    |
| <b>Cu-TiO<sub>2</sub>-2</b> | 0.362%                                 | 0.354%                                    |
| <b>Cu-TiO<sub>2</sub>-3</b> | 0.483%                                 | 0.359%                                    |
| <b>Cu-TiO<sub>2</sub>-4</b> | 0.604%                                 | 0.399%                                    |
| <b>Cu-TiO<sub>2</sub>-5</b> | 0.725%                                 | 0.459%                                    |
| <b>Cu-TiO<sub>2</sub>-6</b> | 0.846%                                 | 0.498%                                    |



**Table S2.** Table for the specific surface area and efficiency of hydrogen evolution of various materials

| Materials                                  | Specific surface area (BET)            | The efficiency of hydrogen evolution          | Ref.      |
|--------------------------------------------|----------------------------------------|-----------------------------------------------|-----------|
| Co SA-TiO <sub>2</sub>                     | 56 m <sup>2</sup> ·g <sup>-1</sup>     | 1.682 mmol·g <sup>-1</sup> ·h <sup>-1</sup>   | [2]       |
| Pt SA/Def-s-TiO <sub>2</sub>               | 78.6 m <sup>2</sup> ·g <sup>-1</sup>   | 13.46 mmol·g <sup>-1</sup> ·h <sup>-1</sup>   | [3]       |
| SAAg-g-CN                                  | 53.2 m <sup>2</sup> ·g <sup>-1</sup>   | 0.498 mmol·g <sup>-1</sup> ·h <sup>-1</sup>   | [4]       |
| Pt <sub>0.1</sub> -CN                      | 95.3 m <sup>2</sup> ·g <sup>-1</sup>   | 0.473 mmol·g <sup>-1</sup> ·h <sup>-1</sup>   | [5]       |
| Ag@Ni/TiO <sub>2</sub>                     | 31.3 m <sup>2</sup> ·g <sup>-1</sup>   | 2.9339 mmol·g <sup>-1</sup> ·h <sup>-1</sup>  | [6]       |
| a-MoS <sub>x</sub> /TiO <sub>2</sub>       | 31.3 m <sup>2</sup> ·g <sup>-1</sup>   | 1.106 mmol·g <sup>-1</sup> ·h <sup>-1</sup>   | [7]       |
| MoS <sub>x</sub> -rGO/<br>TiO <sub>2</sub> | 50.1 m <sup>2</sup> ·g <sup>-1</sup>   | 0.2066 mmol·g <sup>-1</sup> ·h <sup>-1</sup>  | [8]       |
| Co-NG/TiO <sub>2</sub>                     | 73.6 m <sup>2</sup> ·g <sup>-1</sup>   | 0.67744 mmol·g <sup>-1</sup> ·h <sup>-1</sup> | [9]       |
| CuO <sub>x</sub> /TiO <sub>2</sub>         | 144.6 m <sup>2</sup> ·g <sup>-1</sup>  | 0.1126 mmol·g <sup>-1</sup> ·h <sup>-1</sup>  | [10]      |
| Cu-TiO <sub>2</sub>                        | 159.02 m <sup>2</sup> ·g <sup>-1</sup> | 21.053 mmol·g <sup>-1</sup> ·h <sup>-1</sup>  | this work |

**Table S3.** The fitted PL decay results of pure TiO<sub>2</sub> and 0.399 wt% Cu-TiO<sub>2</sub>

| <b>Sample</b>       | <b><math>\tau_1</math>(ns)</b> | <b><math>\tau_2</math>(ns)</b> | <b>A<sub>1</sub></b> | <b>A<sub>2</sub></b> | <b>Decay Lifetime(ns)</b> |
|---------------------|--------------------------------|--------------------------------|----------------------|----------------------|---------------------------|
| TiO <sub>2</sub>    | 4.745                          | 47.255                         | 4945.279             | 4530.26              | 25.070                    |
| Cu-TiO <sub>2</sub> | 4.259                          | 46.145                         | 5892.575             | 3550.06              | 20.007                    |

## Reference

- [1] Wei X, Zhu G, Fang J and Chen J. Synthesis, characterization, and photocatalysis of well-dispersible phase-pure anatase TiO<sub>2</sub> nanoparticles[J]. *International Journal of Photoenergy*, 2013, 2013.
- [2] Xin W, Shouwei Z, Mei Q, Yang L, Yongfan Z, Pengfei A, Jing Z, Huabin Z, Jian Z. Atomically defined Co on two-dimensional TiO<sub>2</sub> nanosheet for photocatalytic hydrogen evolution[J]. *Chemical Engineering Journal*, 2021, 420: 127681.
- [2] Xiaoling H, Junying S, Jingli L, Hao Z, Zhiming S, Chunquan L, Shuilin Zheng, Qingxia L. Single-atomic Pt sites anchored on defective TiO<sub>2</sub> nanosheets as a superior photocatalyst for hydrogen evolution[J]. *Journal of Energy Chemistry*, 2021, 62: 1-10.
- [4] Xiaojie L, Shiyong Z, Xiaoguang D, Huayang Z, Shi-ze Y, Panpan Z, Sanping J, Shaomin L, Hongqi S, Shaobin W. Coupling hydrothermal and photothermal single-atom catalysis toward excellent water splitting to hydrogen[J]. *Applied Catalysis B: Environmental*, 2021, 283: 119660.
- [5] Yuanqing Z, Tian W, Tao X, Yingxuan L, Chuanyi W. Size effect of Pt co-catalyst on photocatalytic efficiency of g-C<sub>3</sub>N<sub>4</sub> for hydrogen evolution[J]. *Applied Surface Science*, 2019, 464: 36-42.
- [6] Gao D, Liu W, Xu Y, Ping W, Jiajie F, Huogen Y. Core-shell Ag@Ni cocatalyst on the TiO<sub>2</sub> photocatalyst: one-step photoinduced deposition and its improved H<sub>2</sub>-evolution activity[J]. *Applied Catalysis B: Environmental*, 2020, 260: 118190.
- [7] Yu H, Yuan R, Gao D, Ying Xu, Jiaguo Yu. Ethyl acetate-induced formation of amorphous MoS<sub>x</sub> nanoclusters for improved H<sub>2</sub>-evolution activity of TiO<sub>2</sub> photocatalyst[J]. *Chemical Engineering Journal*, 2019, 375: 121934.
- [8] Ying X, Yongan L, Ping W, Xuefei W, Huogen Y. Highly efficient dual cocatalyst-modified TiO<sub>2</sub> photocatalyst: RGO as electron-transfer mediator and MoS<sub>x</sub> as H<sub>2</sub>-evolution active site[J]. *Applied Surface Science*, 2018, 430: 176-183.
- [9] Lanhua Y, Fujun L, Jing L, Caixian Z. Efficient noble-metal-free Co-NG/TiO<sub>2</sub> photocatalyst for H<sub>2</sub> evolution: Synergistic effect between single-atom Co and N-doped graphene for enhanced photocatalytic activity[J]. *ACS Sustainable Chemistry & Engineering*, 2018, 6(10): 12766-12775.
- [10] Fan Y, Menglei L, Xin C, Zuwei X, Haibo Z. Simultaneous control over lattice doping and nanocluster modification of a hybrid CuO<sub>x</sub>/TiO<sub>2</sub> photocatalyst during flame synthesis for enhancing hydrogen evolution[J]. *Solar RRL*, 2018, 2(12): 1800215.
